# Transcription Profiles of Endothelial Cells in the Rat Ductus Arteriosus during a Perinatal Period

Norika Mengchia Liu<sup>1</sup>, Tomohiro Yokota<sup>1</sup>, Shun Maekawa<sup>2</sup>, Ping Lü<sup>1,3</sup>, Inbun Tei<sup>4</sup>, Hideki Taniguchi<sup>4</sup>, Utako Yokoyama<sup>5</sup>, Takashi Kato<sup>2</sup>, Susumu Minamisawa<sup>1,3\*</sup>

**1** Department of Life Science and Medical Bioscience, Waseda University, Tokyo, Japan, **2** Department of Biology School of Education, Waseda University, Tokyo, Japan, **3** Department of Cell Physiology, Jikei University, Tokyo Japan, **4** Department of Regenerative Medicine, Yokohama City University, Yokohama, Japan, **5** Cardiovascular Research Institute, Yokohama City University, Yokohama, Japan

## Abstract

Endothelial cells (ECs) lining the blood vessels serve a variety of functions and play a central role in the homeostasis of the circulatory system. Since the ductus arteriosus (DA) has different arterial characteristics from its connecting vessels, we hypothesized that ECs of the DA exhibited a unique gene profile involved in the regulation of DA-specific morphology and function. Using a fluorescence-activated cell sorter, we isolated ECs from pooled tissues from the DA or the descending aorta of Wistar rat fetuses at full-term of gestation (F group) or neonates 30 minutes after birth (N group). Using anti-CD31 and anti-CD45 antibodies as cell surface markers for ECs and hematopoietic derived cells, respectively, cDNAs from the CD31-positive and CD45-negative cells were hybridized to the Affymetrix GeneChip<sup>®</sup> Rat Gene 1.0 ST Array. Among 26,469 gene-level probe sets, 82 genes in the F group and 81 genes in the N group were expressed at higher levels in DA ECs than in aortic ECs ( $p < 0.05$ , fold change  $> 2.0$ ). In addition to well-known endothelium-enriched genes such as *Tgfb2* and *Vegfa*, novel DA endothelium-dominant genes including *Slc38a1*, *Capn6*, and *Lrat* were discovered. Enrichment analysis using GeneGo MetaCore software showed that DA endothelium-related biological processes were involved in morphogenesis and development. We identified many overlapping genes in each process including neural crest-related genes (*Hoxa1*, *Hoxa4*, and *Hand2*, etc) and the second heart field-related genes (*Tbx1*, *Isl1*, and *Fgf10*, etc). Moreover, we found that regulation of epithelial-to-mesenchymal transition, cell adhesion, and retinol metabolism are the active pathways involved in the network via potential interactions with many of the identified genes to form DA-specific endothelia. In conclusion, the present study uncovered several significant differences of the transcriptional profile between the DA and aortic ECs. Newly identified DA endothelium-dominant genes may play an important role in DA-specific functional and morphologic characteristics.

**Citation:** Liu NM, Yokota T, Maekawa S, Lü P, Tei I, et al. (2013) Transcription Profiles of Endothelial Cells in the Rat Ductus Arteriosus during a Perinatal Period. PLoS ONE 8(9): e73685. doi:10.1371/journal.pone.0073685

**Editor:** Hiromi Yanagisawa, UT-Southwestern Med Ctr, United States of America

**Received:** May 15, 2013; **Accepted:** July 19, 2013; **Published:** September 27, 2013

**Copyright:** © 2013 Liu et al. This is an open-access article distributed under the terms of the Creative Commons Attribution License, which permits unrestricted use, distribution, and reproduction in any medium, provided the original author and source are credited.

**Funding:** This work was supported by grants from the Ministry of Education, Culture, Sports, Science and Technology of Japan (U.Y., S.M.), a Grant-in-Aid for Scientific Research on Innovative Areas (U.Y.), the Yokohama Foundation for Advanced Medical Science (U.Y., S.M.), the "High-Tech Research Center" Project for Private Universities: MEXT (T.K., S.M.), MEXT-Supported Program for the Strategic Research Foundation at Private Universities (T.K., S.M.), the Vehicle Racing Commemorative Foundation (U.Y., S.M.), Miyata Cardiology Research Promotion Funds (U.Y.), the Takeda Science Foundation (U.Y., S.M.), and the Shimabara Science Promotion Foundation (S.M.). The funders had no role in study design, data collection and analysis, decision to publish, or preparation of the manuscript.

**Competing Interests:** The authors have declared that no competing interests exist.

\* E-mail: sminamis@jikei.ac.jp

## Introduction

A wide variety of vascular biology studies in the past several decades have verified that the vascular endothelium plays a critical role in the homeostasis of the cardiovascular system. Endothelial cells (ECs) lining blood vessels form monolayers to cover the inner lumen of all types of the vessels in the normal state. The vascular endothelium regulates vasomotor tone by secretion of several vasoactive substances such as nitric oxide. It also mediates leukocyte trafficking and monocyte activation to control platelet adhesion and coagulation. In addition, it interacts with vascular smooth muscle to mediate proliferation and differentiation of smooth muscle cells (SMCs). ECs respond diversely to a variety of external or internal stimuli to alter membrane permeability, transcellular transport systems, membrane adhesive molecules, various growth factor secretions, and so on [1,2]. These responses occur in order to fulfill the needs of tissues and maintain the homeostasis of the circulatory system. Endothelial phenotypic

heterogeneity also plays an important role in the remodeling of the cardiovascular system where specific ECs are localized [3,4].

The ductus arteriosus (DA), a fetal shunt artery between the pulmonary artery and the aorta, closes promptly after birth, although its connecting arteries remain open. The DA exhibits characteristics that are distinct from those of its connecting arteries. For example, the DA is more sensitive to the change in circulating oxygen concentration and prostaglandin E<sub>2</sub> [5–7]. Since the changes in circulating oxygen concentration and prostaglandin E<sub>2</sub> directly transduce the intravascular lumen where ECs surround its surface, ECs of the DA must play an important role in regulating these distinct characteristics. Accordingly, several studies have demonstrated the endothelium-dependent or independent vasoreaction of the DA [8–11]. Nonetheless, the majority of previous studies investigating molecular events in the DA utilized the whole DA tissue or cultured SMCs. Therefore, the role of DA ECs remains largely unknown. We hypothesized that the ECs of the DA exhibit a unique gene profile involved in DA-

specific vasoconstriction and vascular remodeling. Recently, Weber et al. reported that they successfully isolated ECs from fetal rat DA using the immunomagnetic cell separation method and harvested the isolated ECs to further confirm their purity by flow cytometry analysis [12]. In the present study, we investigated gene expression differences in ECs between the DA and the aorta by using a combination of fluorescence-activated cell sorter (FACS) and DNA microarray experiments followed by further enrichment analysis using MetaCore GeneGo software.

## Materials and Methods

### Antibodies

FITC-conjugated anti-CD31 antibody was obtained from Abcam (Cambridge, MA, USA). APC/Cy7-conjugated anti-CD45, FITC-conjugated anti-control IgG, and APC/Cy7-conjugated anti-control IgG antibodies were obtained from Biolegend (San Diego, CA, USA).

### Animals

Timed-pregnant Wistar rats were purchased from Japan SLC, Inc. (Shizuoka, Japan). Rat fetuses at the 21st day of gestation as full-term were divided into two groups: fetuses before breathing (F group) and neonates obtained 30 minutes after breathing (N group). Animals in both groups were delivered by cesarean section. All animals were cared for in compliance with the American Physiological Society. The experiments were approved by the Ethical Committee on Animal Experiments of Waseda University.

### Fluorescence Activated Cell Sorter (FACS)

Pooled tissues from the DA or the aorta were obtained from three litters of timed-pregnant Wistar rats, which accounted for approximately thirty fetuses. Tissues were treated with collagenase-dispase enzyme mixture as described previously [13]. Approximately  $1.0 \times 10^6$  cells were obtained from combined whole DA tissues from the three litters. These cells were reacted with FITC-conjugated anti-CD31 and APC/Cy7-conjugated anti-CD45 antibodies as cell surface markers for EC and hematopoietic derivation cells, respectively. In order to confirm the nonspecific binding of antibodies to cells, we also prepared the cells reacted with a fluorescence conjugated anti-control IgG antibody. When dead cells reacted with PI solutions (Dojindo, Kumamoto, Japan), we found that about 30% of the cells ( $3.0 \times 10^5$  cells) stained with PI solutions had died during isolation. The dead cells were then

removed from further analysis. All cells were detected and sorted using BD FACSAria™II (Becton Dickinson, San Jose, CA, USA). In order to obtain as many cells as possible without affecting their purity, we set the FACS's sorting mode on "purity" in our cell sorter, which allowed the machine to automatically abort any possible forms of contamination, such as doublet cells, and to yield a purity of approximately more than 99%. In addition, we used the 100  $\mu$ m size of the nozzle to decrease its sorting speed, which may contribute to an increase in accuracy. Therefore, we did not check the purity of the sorted endothelial cells by re-run, because the amount of ECs from rat DA was extremely small. The sorted cells were received by a 1.5 ml centrifuge tube containing 500  $\mu$ l of DPBS (Wako, Osaka, Japan) and 0.4  $\mu$ l of RNase inhibitor (Roche, Meylan, France).

### Quantitative real-time PCR (qRT-PCR)

The cell suspensions sorted by FACS were centrifuged at  $300 \times g$  for 15 minutes, and the precipitation was quickly frozen in liquid nitrogen. Total RNA was extracted from the collected cells using an RNeasy micro kit (Qiagen, Valencia, CA, USA) according to the manufacturer's instructions. Total RNA was reverse-transcribed to cDNA using a High Capacity cDNA Reverse Transcription Kit (Applied Biosystems, Foster City, CA, USA). For quantitative RT-PCR analysis, sequences for PCR primers are listed in **Table 1**. qRT-PCR was performed using a Step One Real-time PCR System (Applied Biosystems) with Fast SYBR Green Master Mix (Applied Biosystems). The abundance of each gene was determined relative to an internal control using 18S rRNA. For each qRT-PCR experiment, which included an RT-negative control, we confirmed there was no non-specific amplification in any reaction.

### DNA microarray procedure

We repeated FACS sorting ten times for each developmental group (30 litters used in total) in order to accumulate enough total RNA (~100 ng). Then, cDNA was generated using the WT Expression Kit (Ambion, Austin, TX, USA) in accordance with the manufacturer's protocol. Briefly, a total of 100 ng of total RNA was reverse-transcribed to cDNA, which was subsequently used as a template for an *in vitro* transcription reaction. Sense-strand cDNA that contains dUTP was synthesized by amplified cRNA. We used the Affymetrix GeneChip® WT Terminal Labeling Kit (Affymetrix, Santa Clara, CA, USA) to recognize the dUTP and to fragment the cDNA with uracil-DNA glycosylase

**Table 1.** List of primer sequences used for quantitative RT-PCR.

| Gene name*       | NCBI Accession No. | Primer sequence         |                           |
|------------------|--------------------|-------------------------|---------------------------|
|                  |                    | Forward                 | Reverse                   |
| Tie2             | NM_001105737.1     | GGACAGTGCTCCAACCAAT     | CATCCCCAAAGTAAGGCTCA      |
| $\gamma$ 2-actin | NM_012893.1        | ATGTGGATCAGCAAGCCAGAG   | GGTTTAAATGATCTGTGACTGGTGA |
| Ednra            | NM_012550.2        | CAACGGACCATCGCAGGAGCTTG | GGAGCCAGACGGAGCCTGAGC     |
| Slc38a1          | NM_138832.1        | GTCCTGCCAATCTACAGCGA    | GTACCCAAAGATGGCGGTCA      |
| Lrat             | NM_022280.2        | CAGGCTGAGAAGTTTCACGA    | CATCCACAAGCAGAACGGGA      |
| 18S              | NR_003278.3        | AGCCTGAGAAACGGCTACC     | TCCCAAGATCCAACACTACGAG    |
| GAPDH            | NM_017008.4        | AGGTCGGTGTGAACGGATTTG   | TGTAGACCATGTGATTTGAGGTCA  |

\*The mRNA descriptions are listed below;

Tie2: TEK tyrosine kinase, endothelial;  $\gamma$ 2-actin: actin, gamma 2, smooth muscle, enteric; Ednra: endothelin receptor type A; Slc38a1: solute carrier family 38, member 1; Lrat: lecithin-retinol acyltransferase; 18S: 18S ribosomal RNA; GAPDH: glyceraldehyde-3-phosphate dehydrogenase.

doi:10.1371/journal.pone.0073685.t001

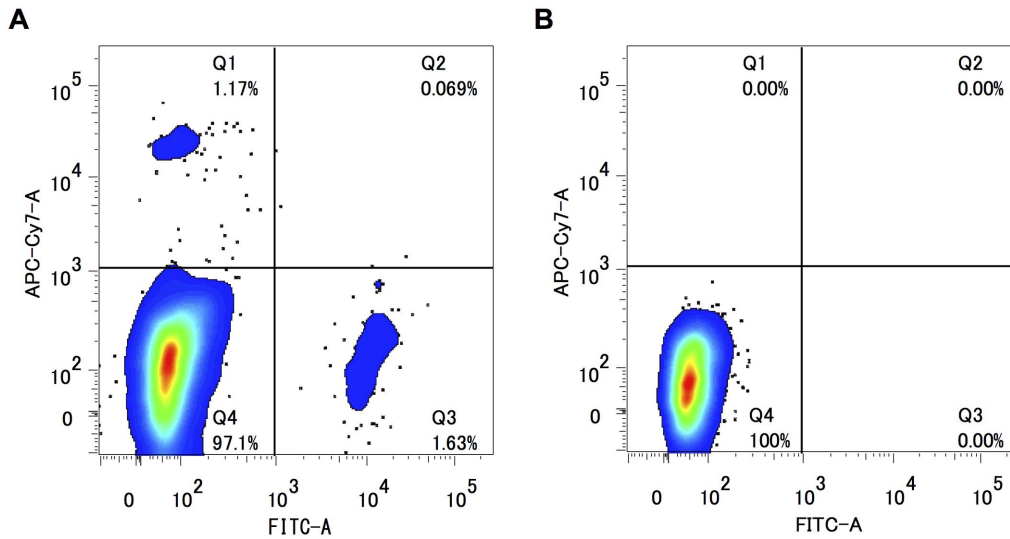

**Figure 1. CD31+ cells successfully divided from whole tissue by FACS.** A) Population of cells reacted with FITC-conjugated anti-CD31 antibody (CD31) and APC/Cy7-conjugated anti-CD45 antibody (CD45). CD31<sup>-</sup>/CD45<sup>-</sup>: consisting mainly of SMCs, CD31<sup>+</sup>/CD45<sup>-</sup>: consisting entirely of ECs B) Population of cells reacted with fluorescence conjugated anti-control IgG antibodies in order to confirm the nonspecific binding of antibodies.  
doi:10.1371/journal.pone.0073685.g001

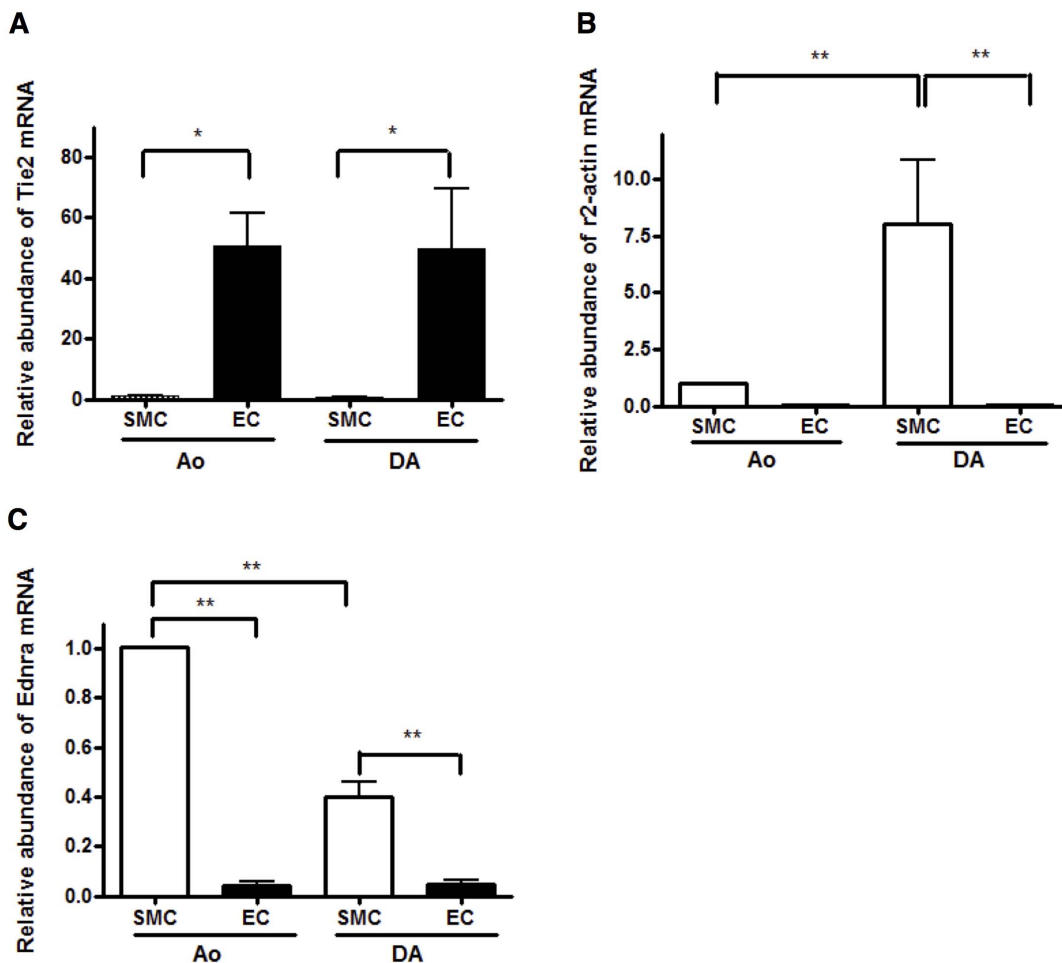

**Figure 2. Obvious differences in gene expression between sorted ECs and SMCs.** A) The expression levels of Tie2 mRNA were significantly higher in ECs than in SMCs. (\* $p < 0.05$ ,  $n = 5$ ) B) The expression levels of  $\gamma 2$ -actin mRNA were significantly lower in ECs than in SMCs. (\*\* $p < 0.001$ ,  $n = 5$ ) C) The expression levels of Ednra mRNA were significantly lower in ECs than in SMCs. (\*\* $p < 0.001$ ,  $n = 3$ ).  
doi:10.1371/journal.pone.0073685.g002

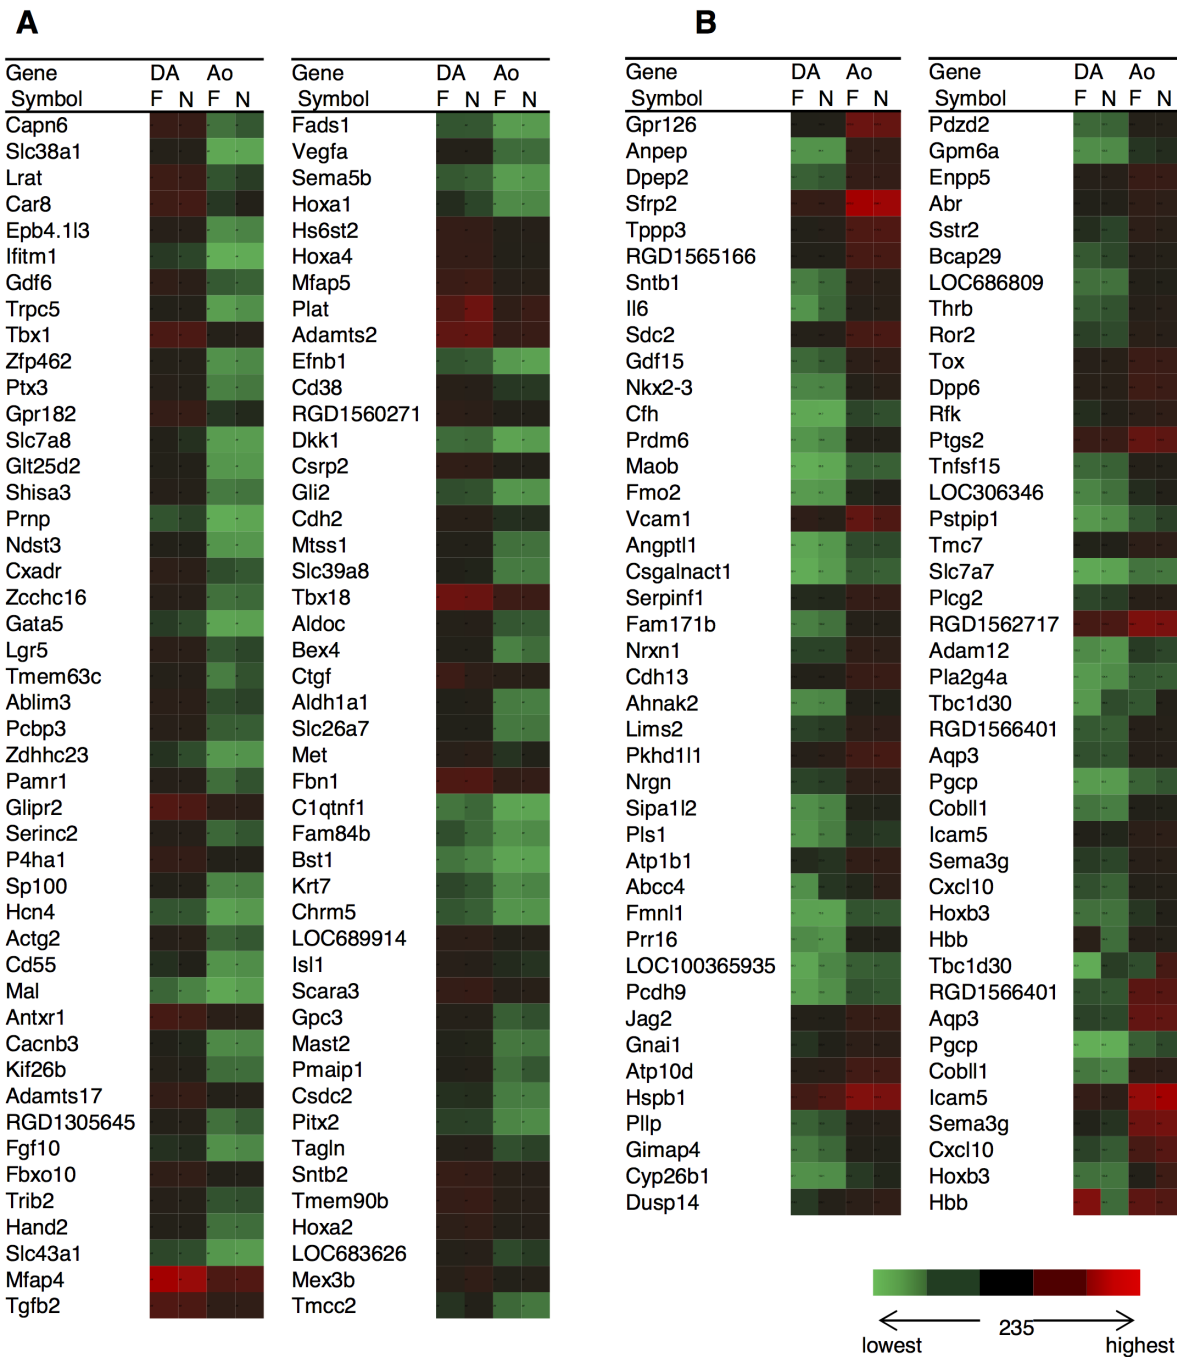

**Figure 3. Color scale table imitating heat maps of DA dominant genes and Ao dominant genes.** The listed genes in A) and B) are the same as in Table 2 and Table 3, respectively. The color scale is based on their expression intensities. The green or red color indicates the lowest or the highest expression levels, respectively. The midpoint shown as a dark color represents 235 since it is the average of whole gene expression. doi:10.1371/journal.pone.0073685.g003

(UDG) and apurinic/aprimidinic endonuclease 1 (APE1). These fragmented cDNAs were then labeled through a terminal deoxytransferase reaction and hybridized to the Affymetrix GeneChip® Rat Gene 1.0 ST Array (Affymetrix). The hybridization experiments were performed in triplicate (approximately 180 litters were needed in total), and the intensities were averaged.

**Microarray data analysis**

Of the 26,469 genes on the microarray, 14,944 were excluded based on aberrant low signals as determined by the poly-A spike of *hps* (probe set ID: 10700066) expression, the smallest composition out of the poly-A RNA control cocktail, which was added in each total RNA sample. All remaining gene probes were analyzed for their differential expression between the DA and the aorta at each developmental stage. Initially, we calculated the *p* value by Student's *t*-test across each group, and the data were cut off at

**Table 2.** DA endothelium-dominant genes.

| Probe set ID | mRNA Description                                                                     | Gene Symbol | Fold change (DA/Ao) |      |
|--------------|--------------------------------------------------------------------------------------|-------------|---------------------|------|
|              |                                                                                      |             | F                   | N    |
| 10906592     | solute carrier family 38, member 1                                                   | Slc38a1     | 7.31                | 6.81 |
| 10932759     | calpain 6                                                                            | Capn6       | 8.18                | 6.04 |
| 10823949     | lecithin-retinol acyltransferase                                                     | Lrat        | 6.98                | 5.15 |
| 10875375     | carbonic anhydrase 8                                                                 | Car8        | 5.88                | 4.94 |
| 10925936     | erythrocyte protein band 4.1-like 3                                                  | Epb4.1l3    | 5.05                | 4.27 |
| 10764702     | similar to glycosyltransferase 25 domain containing 2                                | Glt25d2     | 3.90                | 4.18 |
| 10903177     | G protein-coupled receptor 182                                                       | Gpr182      | 4.12                | 4.12 |
| 10712171     | interferon induced transmembrane protein 1                                           | Ifitm1      | 4.89                | 3.99 |
| 10867593     | growth differentiation factor 6                                                      | Gdf6        | 4.82                | 3.89 |
| 10752295     | T-box 1                                                                              | Tbx1        | 4.69                | 3.80 |
| 10932726     | transient receptor potential cation channel, subfamily C, member 5                   | Trpc5       | 4.73                | 3.78 |
| 10869158     | similar to zinc finger protein 462                                                   | Zfp462      | 4.52                | 3.53 |
| 10840076     | prion protein                                                                        | Prnp        | 3.70                | 3.52 |
| 10826561     | similar to N-deacetylase/N-sulfotransferase (heparan glucosaminyl) 3                 | Ndst3       | 3.69                | 3.36 |
| 10749983     | coxsackie virus and adenovirus receptor                                              | Cxadr       | 3.65                | 3.36 |
| 10937327     | similar to zinc finger, CCHC domain containing 5                                     | Zcchc16     | 3.63                | 3.32 |
| 10783648     | solute carrier family 7, member 8                                                    | Slc7a8      | 3.95                | 3.25 |
| 10776676     | shisa homolog 3 ( <i>Xenopus laevis</i> )                                            | Shisa3      | 3.76                | 3.16 |
| 10815785     | pentraxin related gene                                                               | Ptx3        | 4.28                | 3.14 |
| 10829418     | poly(rC) binding protein 3                                                           | Pcbp3       | 3.01                | 3.10 |
| 10714323     | aldehyde dehydrogenase 1 family, member A1                                           | Aldh1a1     | 2.19                | 3.08 |
| 10924824     | SP100 nuclear antigen                                                                | Sp100       | 2.83                | 3.00 |
| 10863549     | actin, gamma 2, smooth muscle, enteric                                               | Actg2       | 2.76                | 2.96 |
| 10852378     | GATA binding protein 5                                                               | Gata5       | 3.60                | 2.91 |
| 10931308     | prolyl 4-hydroxylase, alpha polypeptide I                                            | P4ha1       | 2.86                | 2.89 |
| 10804750     | similar to Actin-binding LIM protein 3                                               | Ablim3      | 3.15                | 2.88 |
| 10902420     | leucine rich repeat containing G protein coupled receptor 5                          | Lgr5        | 3.49                | 2.84 |
| 10862554     | 31 kDa protein                                                                       | Hoxa4       | 2.42                | 2.77 |
| 10767388     | Cd55 molecule                                                                        | Cd55        | 2.75                | 2.76 |
| 10868627     | similar to GLI pathogenesis-related 2                                                | Glipr2      | 2.87                | 2.75 |
| 10934173     | ephrin B1                                                                            | Efnb1       | 2.35                | 2.66 |
| 10876507     | similar to F-box only protein 10                                                     | Fbxo10      | 2.56                | 2.65 |
| 10935038     | brain expressed gene 4                                                               | Bex4        | 2.2                 | 2.62 |
| 10837351     | solute carrier family 43, member 1                                                   | Slc43a1     | 2.52                | 2.60 |
| 10707862     | similar to ADAM metalloproteinase with thrombospondin type 1 motif, 17 preproprotein | Adamts17    | 2.61                | 2.60 |
| 10880095     | serine incorporator 2                                                                | Serinc2     | 2.87                | 2.56 |
| 10838117     | peptidase domain containing associated with muscle regeneration 1                    | Pamr1       | 2.95                | 2.55 |
| 10886162     | transmembrane protein 63c                                                            | Tmem63c     | 3.49                | 2.53 |
| 10745095     | aldolase C, fructose-bisphosphate                                                    | Aldoc       | 2.22                | 2.51 |
| 10833152     | cysteine and glycine-rich protein 2                                                  | Csrp2       | 2.31                | 2.48 |
| 10739927     | C1q and tumor necrosis factor related protein 1                                      | C1qtnf1     | 2.15                | 2.48 |
| 10858499     | microfibrillar associated protein 5                                                  | Mfap5       | 2.42                | 2.46 |
| 10792421     | plasminogen activator, tissue                                                        | Plat        | 2.41                | 2.46 |
| 10853819     | met proto-oncogene                                                                   | Met         | 2.17                | 2.44 |
| 10791504     | heart and neural crest derivatives expressed 2                                       | Hand2       | 2.52                | 2.42 |
| 10713857     | fatty acid desaturase 1                                                              | Fads1       | 2.46                | 2.38 |
| 10899023     | calcium channel, voltage-dependent, beta 3 subunit                                   | Cacnb3      | 2.67                | 2.38 |
| 10863777     | anthrax toxin receptor 1                                                             | Antxr1      | 2.70                | 2.37 |

**Table 2. Cont.**

| Probe set ID | mRNA Description                                                        | Gene Symbol | Fold change (DA/Ao) |      |
|--------------|-------------------------------------------------------------------------|-------------|---------------------|------|
|              |                                                                         |             | F                   | N    |
| 10813172     | fibroblast growth factor 10                                             | Fgf10       | 2.58                | 2.37 |
| 10939764     | glypican 3                                                              | Gpc3        | 2.04                | 2.36 |
| 10766082     | kinesin family member 26B                                               | Kif26b      | 2.65                | 2.35 |
| 10896751     | metastasis suppressor 1                                                 | Mtss1       | 2.27                | 2.35 |
| 10921772     | vascular endothelial growth factor A, transcript variant 1              | Vegfa       | 2.45                | 2.34 |
| 10733258     | ADAM metalloproteinase with thrombospondin type 1 motif, 2              | Adamts2     | 2.40                | 2.30 |
| 10910473     | hyperpolarization activated cyclic nucleotide-gated potassium channel 4 | Hcn4        | 2.81                | 2.29 |
| 10751190     | zinc finger, DHHC-type containing 23                                    | Zdhhc23     | 2.96                | 2.24 |
| 10777232     | CD38 molecule                                                           | Cd38        | 2.34                | 2.21 |
| 10919175     | T-box18                                                                 | Tbx18       | 2.23                | 2.21 |
| 10803323     | cadherin 2                                                              | Cdh2        | 2.28                | 2.20 |
| 10939725     | similar to Heparan-sulfate 6-O-sulfotransferase 2                       | Hs6st2      | 2.44                | 2.19 |
| 10922964     | similar to esophageal cancer related gene 4 protein                     | RGD1305645  | 2.60                | 2.17 |
| 10770577     | transforming growth factor, beta 2                                      | Tgfb2       | 2.50                | 2.17 |
| 10875581     | solute carrier family 26, member 7                                      | Slc26a7     | 2.18                | 2.17 |
| 10734242     | microfibrillar-associated protein 4                                     | Mfap4       | 2.51                | 2.15 |
| 10889263     | tribbles homolog 2 (Drosophila)                                         | Trib2       | 2.55                | 2.11 |
| 10767077     | GLI family zinc finger 2                                                | Gli2        | 2.29                | 2.11 |
| 10921428     | similar to inhibitor of MyoD family-a                                   | RGD1560271  | 2.34                | 2.10 |
| 10819269     | solute carrier family 39 (zinc transporter), member 8                   | Slc39a8     | 2.23                | 2.08 |
| 10784579     | scavenger receptor class A, member 3                                    | Scara3      | 2.04                | 2.05 |
| 10849327     | fibrillin 1                                                             | Fbn1        | 2.15                | 2.04 |
| 10729667     | dickkopf homolog 1 (Xenopus laevis)                                     | Dkk1        | 2.32                | 2.02 |
| 10767597     | similar to transmembrane and coiled-coil domains 2                      | Tmcc2       | 1.54                | 2.48 |
| 10888610     | similar to limb-bud and heart                                           | LOC683626   | 1.71                | 2.24 |
| 10818989     | paired-like homeodomain 2, transcript variant 2                         | Pitx2       | 1.96                | 2.14 |
| 10917034     | transgelin                                                              | Tagln       | 1.95                | 2.13 |
| 10708399     | similar to ring finger and KH domain containing 3                       | Mex3b       | 1.68                | 2.12 |
| 10840613     | transmembrane protein 90B                                               | Tmem90b     | 1.85                | 2.11 |
| 10807601     | syntrophin, beta 2                                                      | Sntb2       | 1.93                | 2.02 |
| 10862547     | homeo box A2                                                            | Hoxa2       | 1.76                | 2.01 |
| 10898022     | cold shock domain containing C2, RNA binding                            | Csdc2       | 1.97                | 2.00 |
| 10802375     | phorbol-12-myristate-13-acetate-induced protein 1                       | Pmaip1      | 1.99                | 2.00 |
| 10849700     | mal, T-cell differentiation protein                                     | Mal         | 2.71                | 1.51 |
| 10754454     | semaphorin 5B                                                           | Sema5b      | 2.44                | 1.93 |
| 10862541     | homeo box A1                                                            | Hoxa1       | 2.44                | 1.95 |
| 10717233     | connective tissue growth factor                                         | Ctgf        | 2.19                | 1.29 |
| 10903979     | similar to breast cancer membrane protein 101 isoform 1                 | Fam84b      | 2.15                | 1.51 |
| 10777242     | bone marrow stromal cell antigen 1                                      | Bst1        | 2.12                | 1.68 |
| 10899405     | Keratin, type II cytoskeletal 7                                         | Krt7        | 2.09                | 1.66 |
| 10848165     | cholinergic receptor, muscarinic 5                                      | Chrm5       | 2.09                | 1.89 |
| 10871043     | similar to C05G5.5                                                      | LOC689914   | 2.07                | 1.89 |
| 10821486     | ISL LIM homeobox 1                                                      | Isl1        | 2.05                | 1.93 |
| 10878845     | microtubule associated serine/threonine kinase 2                        | Mast2       | 2.02                | 1.93 |

Eighty two genes in the F group and 81 genes in the N group were expressed more than 2-fold in ECs of the DA than in ECs of the aorta ( $p < 0.05$ ). Among these DA dominant genes, 71 genes were expressed more than 2-fold in ECs of the DA in both groups (above the thick line). F: fetuses before breathing; N: neonates obtained 30 minutes after breathing.

doi:10.1371/journal.pone.0073685.t002

**Table 3.** Aorta endothelium-dominant genes.

| Probe set ID | mRNA Description                                                         | Gene Symbol | Fold change (DA/Ao) |      |
|--------------|--------------------------------------------------------------------------|-------------|---------------------|------|
|              |                                                                          |             | F                   | N    |
| 10722992     | alanyl (membrane) aminopeptidase                                         | Anep        | 0.16                | 0.16 |
| 10716939     | similar to G protein-coupled receptor 126                                | Gpr126      | 0.15                | 0.19 |
| 10816144     | secreted frizzled-related protein 2                                      | Sfrp2       | 0.25                | 0.25 |
| 10810778     | dipeptidase 2                                                            | Dpep2       | 0.25                | 0.28 |
| 10730266     | NK2 transcription factor related, locus 3 (Drosophila)                   | Nkx2-3      | 0.33                | 0.28 |
| 10731622     | similar to MGC45438 protein                                              | RGD1565166  | 0.26                | 0.28 |
| 10810631     | tubulin polymerization-promoting protein family member 3                 | Tppp3       | 0.26                | 0.29 |
| 10787517     | growth differentiation factor 15                                         | Gdf15       | 0.32                | 0.31 |
| 10896020     | syndecan 2                                                               | Sdc2        | 0.31                | 0.33 |
| 10769370     | flavin containing monooxygenase 2                                        | Fmo2        | 0.35                | 0.34 |
| 10826249     | vascular cell adhesion molecule 1                                        | Vcam1       | 0.35                | 0.35 |
| 10768269     | complement factor H                                                      | Cfh         | 0.34                | 0.35 |
| 10903816     | syntrophin, beta 1                                                       | Sntb1       | 0.27                | 0.36 |
| 10801683     | proline rich 16                                                          | Prr16       | 0.42                | 0.36 |
| 10769476     | ATPase, Na <sup>+</sup> /K <sup>+</sup> transporting, beta 1 polypeptide | Atp1b1      | 0.41                | 0.37 |
| 10801761     | similar to PR-domain zinc finger protein 6                               | Prdm6       | 0.34                | 0.37 |
| 10744939     | serine (or cysteine) peptidase inhibitor, clade F, member 1              | Serpinf1    | 0.37                | 0.38 |
| 10859799     | interleukin 6                                                            | Il6         | 0.27                | 0.39 |
| 10892352     | similar to Jagged-2 precursor                                            | Jag2        | 0.44                | 0.40 |
| 10800696     | LIM and senescent cell antigen like domains 2                            | Lims2       | 0.40                | 0.41 |
| 10888368     | neurexin 1                                                               | Nrxn1       | 0.37                | 0.41 |
| 10916228     | neurogranin                                                              | Nrgn        | 0.40                | 0.42 |
| 10932211     | monoamine oxidase B, nuclear gene encoding mitochondrial protein         | Maob        | 0.35                | 0.42 |
| 10808274     | cadherin 13                                                              | Cdh13       | 0.38                | 0.42 |
| 10738676     | formin-like 1                                                            | Fmn1        | 0.42                | 0.42 |
| 10863608     | cytochrome P450, family 26, subfamily b, polypeptide 1                   | Cyp26b1     | 0.46                | 0.42 |
| 10785846     | ATP-binding cassette, sub-family C (CFTR/MRP), member 4                  | Abcc4       | 0.41                | 0.44 |
| 10892330     | similar to AHNAK nucleoprotein isoform 1                                 | Ahnak2      | 0.38                | 0.45 |
| 10837310     | similar to KIAA1946                                                      | Fam171b     | 0.37                | 0.45 |
| 10896405     | polycystic kidney and hepatic disease 1-like 1                           | Pkhd1l1     | 0.40                | 0.45 |
| 10791552     | glycoprotein m6a                                                         | Gpm6a       | 0.46                | 0.45 |
| 10764862     | angiopoietin-like 1                                                      | Angptl1     | 0.37                | 0.46 |
| 10782454     | thyroid hormone receptor beta                                            | Thrb        | 0.48                | 0.46 |
| 10822007     | PDZ domain containing 2                                                  | Pdzd2       | 0.46                | 0.47 |
| 10726371     | similar to ADAM 12 precursor                                             | Adam12      | 0.50                | 0.48 |
| 10811956     | signal-induced proliferation-associated 1 like 2                         | Sipa1l2     | 0.41                | 0.48 |
| 10739364     | somatostatin receptor 2                                                  | Sstr2       | 0.47                | 0.48 |
| 10790939     | similar to KIAA1683                                                      | LOC306346   | 0.49                | 0.48 |
| 10797499     | receptor tyrosine kinase-like orphan receptor 2                          | Ror2        | 0.48                | 0.49 |
| 10704840     | similar to protein 7 transactivated by hepatitis B virus X antigen       | LOC686809   | 0.47                | 0.49 |
| 10805996     | plasma membrane proteolipid (plasmolipin)                                | Pllp        | 0.45                | 0.49 |
| 10776608     | similar to Probable phospholipid-transporting ATPase VD                  | Atp10d      | 0.45                | 0.5  |
| 10859886     | dipeptidylpeptidase 6                                                    | Dpp6        | 0.48                | 0.50 |
| 10724315     | hemoglobin, beta                                                         | Hbb         | 1.21                | 0.44 |
| 10896028     | plasma glutamate carboxypeptidase                                        | Pgcp        | 0.53                | 0.47 |
| 10771655     | chemokine (C-X-C motif) ligand 10                                        | Cxcl10      | 0.61                | 0.48 |
| 10737730     | homeo box B3                                                             | Hoxb3       | 0.64                | 0.48 |
| 10845767     | Cobl-like 1                                                              | Cobl1       | 0.54                | 0.49 |

**Table 3. Cont.**

| Probe set ID | mRNA Description                                                   | Gene Symbol  | Fold change (DA/Ao) |      |
|--------------|--------------------------------------------------------------------|--------------|---------------------|------|
|              |                                                                    |              | F                   | N    |
| 10886816     | cDNA clone IMAGE:8372043.                                          | RGD1566401   | 0.5                 | 0.49 |
| 10908328     | intercellular adhesion molecule 5, telencephalin                   | Icam5        | 0.56                | 0.49 |
| 10876069     | aquaporin 3                                                        | Aqp3         | 0.51                | 0.50 |
| 10786646     | semaphorin 3G                                                      | Sema3g       | 0.56                | 0.50 |
| 10736520     | active BCR-related gene                                            | Abr          | 0.46                | 0.54 |
| 10889560     | B-cell receptor-associated protein 29                              | Bcap29       | 0.47                | 0.63 |
| 10787757     | chondroitin sulfate N-acetylgalactosaminyltransferase 1            | Csgalnact1   | 0.37                | 0.52 |
| 10834031     | dual specificity phosphatase 14                                    | Dusp14       | 0.46                | 0.54 |
| 10926651     | ectonucleotide pyrophosphatase/phosphodiesterase 5                 | Enpp5        | 0.46                | 0.52 |
| 10855387     | GTPase, IMAP family member 4                                       | Gimap4       | 0.45                | 0.58 |
| 10853229     | guanine nucleotide binding protein (G protein), alpha inhibiting 1 | Gnai1        | 0.45                | 0.55 |
| 10761128     | heat shock protein 1                                               | Hspb1        | 0.45                | 0.62 |
| 10833346     | cDNA clone MGC:188337 IMAGE:7453022                                | LOC100365935 | 0.42                | 0.66 |
| 10785523     | similar to Protocadherin 9 precursor isoform 3                     | Pcdh9        | 0.43                | 0.58 |
| 10768376     | phospholipase A2, group IVA (cytosolic, calcium-dependent)         | Pla2g4a      | 0.50                | 0.63 |
| 10811347     | phospholipase C, gamma 2                                           | Plcg2        | 0.49                | 0.51 |
| 10919354     | plastin 1 (I isoform)                                              | Pls1         | 0.41                | 0.57 |
| 10910204     | proline-serine-threonine phosphatase-interacting protein 1         | Pstpip1      | 0.49                | 0.51 |
| 10764551     | prostaglandin-endoperoxide synthase 2                              | Ptgs2        | 0.48                | 0.52 |
| 10934662     | riboflavin kinase                                                  | Rfk          | 0.48                | 0.56 |
| 10753629     | 126 kDa protein                                                    | RGD1562717   | 0.49                | 0.55 |
| 10783537     | solute carrier family 7, member 7                                  | Slc7a7       | 0.49                | 0.56 |
| 10902696     | similar to CG3996-PA                                               | Tbc1d30      | 0.50                | 0.63 |
| 10725253     | similar to Tmc7 protein                                            | Tmc7         | 0.49                | 0.51 |
| 10877532     | tumor necrosis factor (ligand) superfamily, member 15              | Tnfsf15      | 0.48                | 0.54 |
| 10875363     | thymocyte selection-associated high mobility group box             | Tox          | 0.48                | 0.51 |

Sixty five genes in the F group and 52 genes in the N group were expressed more than 2-fold in ECs of the aorta than in ECs of the DA ( $p < 0.05$ ). Among these aorta dominant genes, 43 genes were expressed more than 2-fold in ECs of the aorta in both groups (above the thick line). F: fetuses before breathing; N: neonates obtained 30 minutes after breathing.

doi:10.1371/journal.pone.0073685.t003

$p < 0.05$ . For a more robust differential analysis between the DA and the aorta, we selected the genes that had more than a 2.0-fold change ( $|FC| \geq 2.0$ ). Genes that went through these analyses were considered significant. Genes were further analyzed for enriched biological themes and pathways using the MetaCore program (GeneGo, a division of Thomson Reuters, St. Joseph, MI, USA). The program ranked the significant ontology and pathways dominant in DA ECs in each developmental stage by importing whole expression results (excluding aberrantly low expressed genes) from the microarray. MetaCore is an established program that includes a manually annotated database of gene interactions and metabolic reactions obtained from scientific literature. The enrichment analysis of the biological process was based on the hypergeometric distribution algorithm and relevant pathway maps were then prioritized according to their statistical significance [14]. The complete data set of the DNA microarray is available in the GEO database (accession number: GSE40500).

### Statistical treatment

Data are presented as mean  $\pm$  standard error (SEM) or independent experiments. Statistical analyses were performed between two groups by unpaired two-tailed  $t$  test or unpaired  $t$  test

with Welch correction, and among multiple groups by one-way analysis of variance (ANOVA) followed by Neuman-Keuls multiple comparison test. A  $p$  value of  $< 0.05$  was considered significant.

## Results

### Endothelial cells were purely isolated from rat DA tissues

At least 10,000 of the cells (approximately 1% of the initially isolated cells) were sorted in anti-CD31 positive and anti-CD45 negative areas (CD31<sup>+</sup>/CD45<sup>-</sup>) from the pooled DA tissues of three litters of timed-pregnant Wistar rats (**Figure 1A**). No cell in the CD31<sup>+</sup> area reacted with an anti-IgG antibody (**Figure 1B**), indicating that no false positive cells were contained in the CD31<sup>+</sup>/CD45<sup>-</sup> cells believed to be ECs. We also assumed that CD31<sup>-</sup>/CD45<sup>-</sup> cells mainly consisted of SMCs. The detailed gating strategies of FACS sorting are shown in **Figure S1**. To confirm the purity of FACS isolation, we examined the expression levels of EC-specific and SMC-specific genes by qRT-PCR. The expression levels of Tie2 mRNA, an EC-specific gene, were significantly higher in CD31<sup>+</sup>/CD45<sup>-</sup> cells than in CD31<sup>-</sup>/CD45<sup>-</sup> cells ( $p < 0.05$ ,  $n = 5$ ) (**Figure 2A**). The expression levels of



**Table 4.** Genes showed a significant change ( $p < 0.01$ ) between F and N in the DA.

| Probe set ID | mRNA Description                                                   | Gene Symbol | $p$ -value (F vs N) |
|--------------|--------------------------------------------------------------------|-------------|---------------------|
| 10869253     | UDP-glucose ceramide glucosyltransferase                           | Ugcg        | 0.0005              |
| 10728164     | protein phosphatase 2, regulatory subunit B', beta isoform         | Ppp2r5b     | 0.0012              |
| 10767489     | mitogen-activated protein kinase-activated protein kinase 2        | Mapkapk2    | 0.0015              |
| 10902696     | similar to CG3996-PA                                               | Tbc1d30     | 0.0015              |
| 10927612     | similar to TBC1 domain family, member 8 isoform 3                  | Tbc1d8      | 0.0023              |
| 10912584     | angiominin like 2                                                  | Amotl2      | 0.0026              |
| 10825940     | adenosine monophosphate deaminase 2 (isoform L)                    | Ampd2       | 0.0028              |
| 10940568     | dicarbonyl L-xylulose reductase                                    | Dcxr        | 0.0028              |
| 10861066     | transmembrane protein 106B                                         | Tmem106b    | 0.0030              |
| 10885235     | protein kinase C, eta                                              | Prkch       | 0.0044              |
| 10879257     | cell division cycle 20 homolog (S. cerevisiae)                     | Cdc20       | 0.0054              |
| 10895310     | protein phosphatase 1, regulatory (inhibitor) subunit 12A          | Ppp1r12a    | 0.0057              |
| 10863542     | deoxyguanosine kinase, nuclear gene encoding mitochondrial protein | Dguok       | 0.0057              |
| 10717233     | connective tissue growth factor                                    | Ctgf        | 0.0063              |
| 10727464     | ribosomal protein S6 kinase, polypeptide 2                         | Rps6kb2     | 0.0074              |
| 10836973     | secernin 3                                                         | Scrn3       | 0.0075              |
| 10857655     | LIM and cysteine-rich domains 1                                    | Lmcd1       | 0.0079              |
| 10773088     | LIM domain binding 2                                               | Ldb2        | 0.0080              |
| 10832197     | SNF1-like kinase                                                   | Sik1        | 0.0085              |
| 10864715     | vestigial like 4 (Drosophila)                                      | Vgll4       | 0.0087              |
| 10826371     | palmelphin                                                         | Palmd       | 0.0088              |
| 10730792     | hypothetical protein                                               | ltprp       | 0.0090              |
| 10901713     | nicotin 1                                                          | Nicn1       | 0.0097              |
| 10884898     | similar to Voltage-dependent anion-selective channel protein 1     | RGD1565338  | 0.0098              |
| 10817309     | phosphatidylinositol 4-kinase, catalytic, beta                     | Pi4kb       | 0.0100              |

Twenty five genes shows a significant difference between F and N groups in the DA ( $p$  values were less than 0.01. Among these 25 genes, Ctgf and Tbc1d30 are listed in Table 2 and Table 3, respectively. F: fetuses before breathing; N: neonates obtained 30 minutes after breathing. doi:10.1371/journal.pone.0073685.t004

$\gamma$ 2-actin and endothelin-1 receptor Ednra mRNAs, SMC-specific genes, were significantly lower in CD31<sup>+</sup>/CD45<sup>-</sup> cells than in CD31<sup>-</sup>/CD45<sup>-</sup> cells ( $p < 0.001$ ,  $n = 3 \sim 5$ ) (**Figures 2B and 2C, respectively**). Therefore, we concluded that a FACS could isolate pure ECs in the CD31<sup>+</sup>/CD45<sup>-</sup> area without contamination.

#### Identification of DA-specific genes in ECs

Among over 26,469 gene-level probe sets, we found that 82 genes in the F group and 81 genes in the N group were expressed more than 2-fold in ECs of the DA than in ECs of the aorta ( $p < 0.05$ ) (**Table 2, Figure 3A**). Among these DA dominant genes, 71 genes were expressed more than 2-fold in ECs of the DA in both groups. On the other hand, 65 genes in the F group and 52 genes in the N group were expressed more than 2-fold in ECs of the aorta than in ECs of the DA ( $p < 0.05$ ) (**Table 3, Figure 3B**). Among these aorta dominant genes, 43 genes were expressed more than 2-fold in ECs of the aorta in both groups. Importantly, the majority of the genes in **Table 2** and **3** have never been reported previously as DA-related genes. We found only a limited number of the well-known endothelium-related genes such as transforming

growth factor-beta 2 (Tgfb2) and vascular endothelial growth factor A (Vegfa). Validation of the results from the DNA microarray, qRT-PCR was performed with Slc38a1 and Lrat, the genes with the most significant difference between the DA and the aorta at both developmental stages (**Figure S2**).

Surprisingly, the present results showed remarkably low variations of transcription profiles before and after birth. Although there were 178 genes of which expression levels significantly differed between both developmental stages ( $p < 0.05$ ), arrestin domain containing 3 (Arrdc3) and TBC1 domain family, member 30 (Tbc1d30) were the only two genes that had more than a 2.0-fold change ( $|FC| \geq 2.0$ ) between both developmental stages. Among 178 genes, **Table 4** shows 25 genes of which the  $p$  values were less than 0.01 ( $p < 0.01$ ). Among these 25 genes, connective tissue growth factor (Ctgf) and Tbc1d30 are listed in **Table 2** (DA-dominant) and **Table 3** (aorta-dominant), respectively.

#### Enrichment analysis of DA dominant genes using GeneGo MetaCore software

In the MetaCore systems, there are about 110 cellular and molecular processes whose content is defined and annotated by

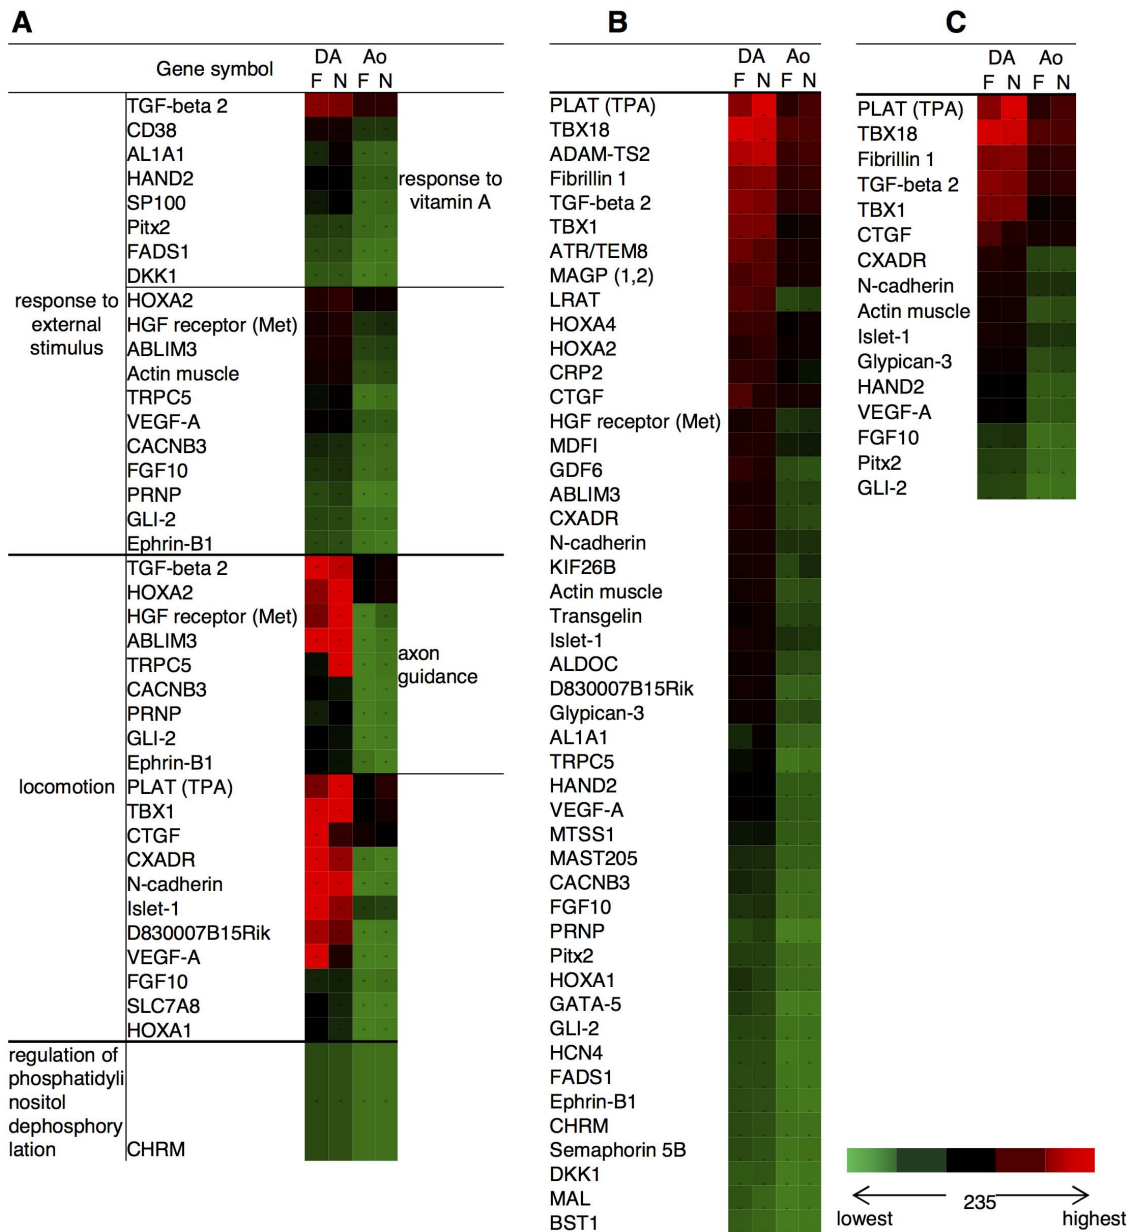

**Figure 4. Color scale table imitating heat maps of the DA dominant genes categorized by GeneGo processes.** DA dominant genes are identified using GO analysis (MetaCore). The whole expression data set was processed by importing it into the MetaCore system. The MetaCore system lined up the top 10 (based on *p*-value) sets of categorized genes according to their GO biological processes (Table 5). The color scale table imitating heat maps was created manually based on the genes in GO biological processes. A) The genes in all the top processes except the development or morphogenesis processes that emerged in both F and N. B) The genes categorized in the processes related to the development and morphogenesis in both F and N. C) The genes categorized only in cardiovascular or circulatory specific development processes. The color scale is the same as that used in Figure 3. All heat maps were created manually based on the genes in the GeneGo biological processes. a) The genes in all the processes in Table 4, except the development or morphogenesis processes which emerged in both F and N. b) The genes categorized in the processes related to development and morphogenesis in both F and N. c) The genes categorized only in cardiovascular or circulatory specific development processes.

doi:10.1371/journal.pone.0073685.g004

GeneGo. The top 10 ranked regulatory biological processes were listed in each stage of the DA ECs based upon their *p* values (Table 5). Most of the categories indicate morphogenesis and development. Four processes (anatomical structure morphogenesis, cardiovascular system development, circulatory system development, and locomotion) are ranked in both the F and N groups. Interestingly, excluding processes related to morphogenesis and development, regulation of phosphatidylinositol dephosphorylation

is an enriched process that is listed only in the F group. On the other hand, response to external stimulus, response to vitamin A stimulus, and axon guidance were listed only in the top 10 ranked biological processes in the N group. In these GeneGo biological processes, 322 and 172 genes were listed in the F and N groups, respectively. The genes included in each category are shown in Figure 4. There are a considerable number of overlapping genes in each process. Table 6 shows the 30 genes that frequently

**Table 5.** Top 10 regulatory biological processes worked in the DA ECs.

| GO Processes                                         | p-value (DA vs Ao) | Developmental stage |
|------------------------------------------------------|--------------------|---------------------|
| Anatomical structure morphogenesis                   | 8.91E-13           | F                   |
| Circulatory system development                       | 2.41E-12           | F                   |
| Cardiovascular system development                    | 2.41E-12           | F                   |
| Developmental process                                | 4.04E-12           | F                   |
| Locomotion                                           | 6.97E-12           | F                   |
| Multicellular organismal development                 | 4.41E-11           | F                   |
| Organ morphogenesis                                  | 1.55E-10           | F                   |
| System development                                   | 1.56E-10           | F                   |
| Anatomical structure development                     | 2.86E-10           | F                   |
| Regulation of phosphatidylinositol dephosphorylation | 3.07E-10           | F                   |
| Muscle structure development                         | 1.35E-10           | N                   |
| Anatomical structure morphogenesis                   | 4.64E-10           | N                   |
| Response to external stimulus                        | 3.98E-09           | N                   |
| Muscle cell differentiation                          | 4.00E-09           | N                   |
| Locomotion                                           | 1.68E-08           | N                   |
| Circulatory system development                       | 1.70E-08           | N                   |
| Cardiovascular system development                    | 1.70E-08           | N                   |
| Tissue morphogenesis                                 | 2.81E-08           | N                   |
| Axon guidance                                        | 3.47E-08           | N                   |
| Response to vitamin A                                | 3.50E-08           | N                   |

The MetaCore systems defined the top 10 ranked regulatory biological processes that were dominantly worked in each stage of the DA ECs based upon their *p* values. F: fetuses before breathing; N: neonates obtained 30 minutes after breathing.  
doi:10.1371/journal.pone.0073685.t005

appeared in more than five processes of the top 10 ranking as active genes. These genes are likely to be involved in the network by potential interactions with many of the identified genes to form DA-specific endothelium.

Furthermore, there are over 1200 pathway maps in MetaCore, comprehensively covering signaling and metabolism, selected diseases and some drug targets mechanisms. All maps are accurately drawn by GeneGo annotators and manually curated and edited. The canonical pathway maps and GeneGo process networks, validated by statistical values, were evaluated by MetaCore and are listed in **Table 7** together with the top 10 ranking for each pathway significantly worked in the DA ECs. As we found that the gene expression profiles exhibited remarkably low variations at both time points, nine of the top 10 ranked pathway maps were listed in both F and N groups. These categories are related to regulation of epithelial-to-mesenchymal transition (EMT), cell adhesion, and retinol metabolism.

## Discussion

To date, the characteristic features of the DA endothelium have remained largely unknown. Several studies have demonstrated the endothelium-dependent or independent vasomotor reaction of the DA [8–11]. Rabinovitch et al. made great efforts to identify the role of the DA endothelium in vascular remodeling of the DA. They found that the increase in the expression of transforming growth factor-beta (Tgfb) in the DA endothelium promoted the synthesis of glycosaminoglycan such as hyaluronan that is a critical regulator of neointimal formation of the DA [15,16]. The present comprehensive gene expression analysis identified a DA endothelium-dominant rat gene profile during a perinatal period for the first time. It should be noted that we collected DA ECs from more

than 30 litters to obtain a sufficient amount of mRNA for one sample. Additionally, the hybridization experiments were performed in triplicate and the intensities were averaged. To avoid an unexpected artificial bias, we did not use cultured ECs or any amplification method to increase mRNA from the endothelium. Therefore, the present study represents the transcription profile of the freshly isolated endothelium from the rat DA. Importantly, most of the genes that were expressed greater or lower in the DA endothelium than in the aortic endothelium have not yet been investigated in the DA. In addition to the up-regulated or down-regulated genes that met the 2-fold threshold in **Table 2** and **3**, one may be interested in genes that showed a statistical significance but a lower than 2.0 difference. We therefore also listed the genes with a statistical significance ( $p < 0.001$ ) in **Table S1** and **Table S2**. Since the endothelium plays a critical role not only in vascular tone but also in vascular remodeling, the newly identified genes should be of great interest for further investigation of the molecular mechanisms of DA-specific differentiation and function.

Although two studies, including our previous one, have identified DA-dominant genes using DNA microarray analysis [17,18], the present study revealed that the transcription profile of DA ECs are quite different from those of DA whole tissues of which the majority is composed of SMCs. These data suggest that the transcription profiles of the DA endothelium are tightly regulated in a cell-specific manner. Furthermore, local interaction between ECs and SMCs may contribute to establishing each unique transcription profile in the DA. It would be beneficial to further investigate how ECs and SMCs interact locally with each other.

**Table 6.** Thirty overlapping genes that appeared in more than five processes of the top ten ranking as active genes.

| ID                               | Gene Symbol | mRNA- Description                                                          | Number of overlapped processes |   |
|----------------------------------|-------------|----------------------------------------------------------------------------|--------------------------------|---|
|                                  |             |                                                                            | F                              | N |
| <i>Receptor ligand</i>           |             |                                                                            |                                |   |
| 10770577                         | Tgfb2       | transforming growth factor, beta 2 (Tgfb2)                                 | 9                              | 9 |
| 10921772                         | Vegfa       | vascular endothelial growth factor A (Vegfa), transcript variant 1         | 9                              | 8 |
| 10813172                         | Fgf10       | fibroblast growth factor 10 (Fgf10)                                        | 9                              | 8 |
| 10934173                         | Efnb1       | ephrin B1 (Efnb1)                                                          | 9                              | 6 |
| 10717233                         | Ctgf        | connective tissue growth factor (Ctgf)                                     | 9                              | 0 |
| 10849327                         | Fbn1        | fibrillin 1 (Fbn1)                                                         | 8                              | 3 |
| <i>Receptor</i>                  |             |                                                                            |                                |   |
| 10749983                         | Cxadr       | coxsackie virus and adenovirus receptor (Cxadr)                            | 7                              | 5 |
| 10853819                         | Met         | met proto-oncogene (Met)                                                   | 6                              | 6 |
| 10848165                         | Chrm5       | cholinergic receptor, muscarinic 5 (Chrm5)                                 | 5                              | 0 |
| <i>Voltage-gated ion channel</i> |             |                                                                            |                                |   |
| 10899023                         | Cacnb3      | calcium channel, voltage-dependent, beta 3 subunit (Cacnb3)                | 6                              | 6 |
| 10932726                         | Trpc5       | transient receptor potential cation channel, subfamily C, member 5 (Trpc5) | 6                              | 4 |
| <i>Binding protein</i>           |             |                                                                            |                                |   |
| 10863549                         | Actg2       | actin, gamma 2, smooth muscle, enteric (Actg2)                             | 9                              | 9 |
| 10803323                         | Cdh2        | cadherin 2 (Cdh2)                                                          | 8                              | 6 |
| 10939764                         | Gpc3        | glypican 3 (Gpc3)                                                          | 8                              | 0 |
| 10804750                         | Ablim3      | actin-binding LIM protein 3 gene:ENSRNOG00000019365                        | 6                              | 4 |
| 10840076                         | Prnp        | prion protein (Prnp)                                                       | 6                              | 4 |
| 10766072                         | Kif26b      | kinesin family member 26B (Kif26b)                                         | 6                              | 2 |
| 10921428                         | RGD1560271  | similar to inhibitor of MyoD family-a                                      | 6                              | 1 |
| 10858499                         | Mfap5       | microfibrillar associated protein 5 (Mfap5)                                | 5                              | 1 |
| <i>Transcriptional factor</i>    |             |                                                                            |                                |   |
| 10767077                         | Gli2        | GLI family zinc finger 2 (Gli2)                                            | 9                              | 7 |
| 10752295                         | Tbx1        | T-box 1 (Tbx1)                                                             | 9                              | 7 |
| 10821486                         | Isl1        | ISL LIM homeobox 1 (Isl1)                                                  | 9                              | 0 |
| 10791504                         | Hand2       | heart and neural crest derivatives expressed 2 (Hand2)                     | 8                              | 6 |
| 10919175                         | Tbx18       | T-box18 (Tbx18)                                                            | 7                              | 6 |
| 10862541                         | Hoxa1       | homeo box A1 (Hoxa1)                                                       | 7                              | 0 |
| 10862554                         | Hoxa4       | homeo box A4 (Hoxa4)                                                       | 6                              | 0 |
| 10818989                         | Pitx2       | paired-like homeodomain 2 (Pitx2), transcript variant 2                    | 0                              | 8 |
| <i>enzyme</i>                    |             |                                                                            |                                |   |
| 10792421                         | Plat        | plasminogen activator, tissue (Plat)                                       | 8                              | 4 |
| 10714323                         | Aldh1a1     | aldehyde dehydrogenase 1 family, member A1 (Aldh1a1)                       | 6                              | 4 |
| 10745095                         | Aldoc       | aldolase C, fructose-bisphosphate (Aldoc)                                  | 6                              | 1 |

Thirty genes that frequently appeared in more than five processes of the top ten ranking in Table 5 are regarded as active genes. These genes are listed in accordance with their function. F: fetuses before breathing; N: neonates obtained 30 minutes after breathing.  
doi:10.1371/journal.pone.0073685.t006

To our surprise, the present study also demonstrated that the transcription profile of DA ECs did not change much before and after birth, although the DA does dramatically alter its morphology during the perinatal period. After birth, the change in oxygen and PGE<sub>2</sub> content in circulating blood induces functional closure of the DA. Costa et al. also demonstrated that the transcription profile of DA tissues significantly differs before and after birth [18]. In their experiment, DA samples were collected 3 hours after spontaneous delivery. We used neonatal DA ECs 30 minutes after

delivery by cesarean section, because we aimed to detect an initial change in the transcription profile of DA ECs after birth. This period, however, may not be long enough to investigate the alternation in its transcription profile, although functional closure of the rat DA had mostly occurred in our previous studies [19,20].

It is very important to investigate the roles of the newly identified genes in the morphology and function of the DA. Unfortunately, an *in vitro* experiment using rat DA ECs is technically very difficult because of the limited amount of tissue

**Table 7.** Top 10 pathways arranged by *p*-value.

| GeneGo Pathway Maps                                                           | <i>p</i> -value (DA vs Ao) | Developmental stage |
|-------------------------------------------------------------------------------|----------------------------|---------------------|
| Development_Regulation of epithelial-to-mesenchymal transition (EMT)          | 7.52E-05                   | F                   |
| Cell adhesion_Cadherin-mediated cell adhesion                                 | 1.04E-04                   | F                   |
| Cell adhesion_Plasmin signaling                                               | 2.56E-04                   | F                   |
| Development_TGF-beta-dependent induction of EMT via SMADs                     | 2.56E-04                   | F                   |
| Development_TGF-beta-dependent induction of EMT via RhoA, PI3K and ILK.       | 5.79E-04                   | F                   |
| Retinol metabolism/Rodent version                                             | 1.97E-03                   | F                   |
| Retinol metabolism                                                            | 2.31E-03                   | F                   |
| Development_S1P2 and S1P3 receptors in cell proliferation and differentiation | 3.87E-03                   | F                   |
| Cell adhesion_Chemokines and adhesion                                         | 5.41E-03                   | F                   |
| Cytoskeleton remodeling_TGF, WNT and cytoskeletal remodeling                  | 7.23E-03                   | F                   |
| Development_Regulation of epithelial-to-mesenchymal transition (EMT)          | 7.52E-05                   | N                   |
| Cell adhesion_Cadherin-mediated cell adhesion                                 | 1.04E-04                   | N                   |
| Development_S1P2 and S1P3 receptors in cell proliferation and differentiation | 1.04E-04                   | N                   |
| Cell adhesion_Plasmin signaling                                               | 2.56E-04                   | N                   |
| Development_TGF-beta-dependent induction of EMT via SMADs                     | 2.56E-04                   | N                   |
| Development_TGF-beta-dependent induction of EMT via RhoA, PI3K and ILK.       | 5.79E-04                   | N                   |
| Retinol metabolism/Rodent version                                             | 1.97E-03                   | N                   |
| Retinol metabolism                                                            | 2.31E-03                   | N                   |
| Muscle contraction_nNOS Signaling in Skeletal Muscle                          | 4.49E-03                   | N                   |
| Cell adhesion_Chemokines and adhesion                                         | 5.41E-03                   | N                   |

Among over 1200 pathways, the MetaCore systems defined the top 10 ranked pathways that were dominantly worked in each stage of the DA ECs based upon their *p* values. F: fetuses before breathing; N: neonates obtained 30 minutes after breathing.

doi:10.1371/journal.pone.0073685.t007

or cells obtainable from small animals. Currently, bioinformatic technology has developed to the point that it is now possible to attribute functions to genes and their encoded proteins, and to identify the regulatory networks controlling metabolic, protein synthesis and signal transduction pathways. To facilitate the analysis of experiments using post-genomic technologies, newly developed knowledge-based gene set enrichment analysis provides a powerful analytical method to link the vast amount of raw data to biological pathways [14,21]. Pathway analysis by MetaCore is based on the concept that the function of a gene depends directly on the context in which it acts, and MetaCore correlates genes identified by DNA microarray with the cellular pathways that are hypothetically activated dominantly in the DA endothelium. The present study revealed possible regulatory factors involved in specific “process networks” such as the regulation of morphogenesis and development. We found a considerable number of overlapping genes in these processes that are likely to be involved in the network through potential interactions with many of the identified genes. The genes listed in **Table 6** are considered the “functional hubs” of the DA endothelium-specific network.

Eight transcription factors in **Table 6** that have been known to be involved in formation of the cardiovascular system may play an important role in forming the endothelial phenotypic heterogeneity of the DA, although none of them has been intensively investigated in the DA. Although several previous studies have demonstrated that the transcription factors Tfp2 $\beta$ , Hif2 $\alpha$ , and myocardin play an important role in ductal smooth muscle development [22,23], the transcriptional regulation of DA

endothelium-specific differentiation remains largely unknown. The DA originates from the sixth pharyngeal arch artery that initially forms as protuberances of the dorsal aorta and the aortic sac [24]. The cells that comprise the pharyngeal arch arteries are of pharyngeal mesoderm origin. The mesodermal core of the arches is continuous with the mesoderm derived from the second heart field (SHF) [25]. To date, the majority of the cells that constitute the DA media are known to derive from cardiac neural crest cells (NCCs) at the somite 1 to somite 3 level [26,27]. The importance of this neural crest origin in understanding specific DA differentiation lies in the segmental nature of the pharyngeal arches themselves and of the origin of the NCCs that invade them. Accordingly, transcription factors related to NCCs such as Hoxa1, Hoxa4, and heart and neural crest derivatives expressed 2 (Hand2) [28–30] are listed in **Table 6**. Although a previous study suggested that Hoxb5 may be involved in DA differentiation [31], the expression level of Hoxb5 mRNA was not increased in the DA ECs in the present study. A recent study in humans revealed that mutations in Hoxa1 can cause severe cardiovascular malformations in patients with Bosley-Salih-Alorainy Syndrome [32]. Furthermore, Hoxa1 null mice show defects such as interrupted aortic arch, aberrant subclavian artery and tetralogy of Fallot, demonstrating that Hoxa1 is required for patterning of the great arteries and outflow tract of the heart [28].

In addition, MetaCore enrichment analysis revealed that the SHF-related transcription factors T-box (Tbx) 1, Tbx18, and Isl1, and the receptor ligand Fgf10 are enriched in the DA endothelium. It has also been shown that Isl1, Fgf10-positive

mesoderm of the posterior arches forms the ECs of arterial blood vessels<sup>25</sup>. Although Rana et al. demonstrated that the endothelium of the pharyngeal arch arteries is largely negative for Tbx1 [33], its expression levels were greater in the DA ECs than in the aortic ECs in the present study. Therefore, the results indicated that the SHF-derived cells are more prevalent in the DA endothelium than in the descending aortic endothelium. To our knowledge, no study has reported that the SHF-derived cells contribute to DA differentiation. Is1 and Tbx1 regulate Fgf10 transcription in the SHF during cardiac outflow formation [34,35]. It would be of value to further investigate the interaction between the NCC-derived and SHF-derived cells in the DA.

Furthermore, MetaCore enrichment analysis identified that the epithelial-to-mesenchymal transition (EMT) pathway functional in the DA ECs. The key genes Tgfb2, actin, alpha 2, smooth muscle, aorta (ACTA2), N-cadherin (cadherin 2, Cdh2), and met proto-oncogene (hepatocyte growth factor receptor, Met) are listed in the pathway. One of the characteristics of the DA vascular remodeling is physiological intimal thickness that is profound during the perinatal period. Within certain environments, endothelial-to-mesenchymal transition (EnMT) plays a role in promoting arterial intimal hyperplasia [36,37]. EnMT shares a number of molecular signaling pathways with Tgfb1-induced EMT [38,39], although it has not been proven that migrated ECs of the DA into the subendothelium differentiate into smooth muscle-like (mesenchymal) cells. Gittenberger-de Groot et al. demonstrated that the invaginated ECs were located in the subendothelial region [40]. In addition, they found that a rat patent DA model exhibited an abundant subendothelial elastic lamina and failure of intimal formation [41]. Therefore, they suggest that some of the intimal-mesenchymal cells are also derived from the invaginated ECs [42]. In agreement with their idea, the present data suggest that EnMT-related signal pathways can be active in the DA endothelium and contribute to physiological intimal thickness of the DA.

MetaCore enrichment analysis also revealed that the retinol metabolism pathway worked in the DA ECs. The key genes lecithin:retinol acyltransferase (Lrat), aldehyde dehydrogenase 1 family, member A1 (Aldh1a1), and Aldh1a7 are listed in the pathway. It is noteworthy that the endogenous retinol signaling may play a role in inducing and maintaining smooth muscle differentiation in the DA [43] and that maternal vitamin A accelerates vascular maturation of the DA in premature fetuses, at least in terms of vascular contraction [44,45]. Furthermore, our previous study showed that maternally administered vitamin A increased fibronectin production and intimal thickening in the rat DA [46]. Therefore, we may reconsider vitamin A as a candidate for treatment of patent DA, even though one study demonstrated that postnatal vitamin A therapy did not have a beneficial effect on ductal closure in premature infants [47]. Indeed, there are several

studies demonstrating that vitamin A induces various embryonic developments via many different pathways such as Tgfb2, Cdh2, or Pitx2 [48]. Recently, Amengual et al. identified that Lrat is critical for cellular uptake of vitamin A from serum retinol-binding protein [49].

In conclusion, the present comprehensive transcription analysis identified the novel DA endothelium-dominant genes during a perinatal period that are highly related with biological processes involved in morphogenesis and development. Moreover, we found that regulation of epithelial-to-mesenchymal transition, cell adhesion, and retinol metabolism are the active pathways that form DA-specific endothelium. Newly identified DA endothelium-dominant genes may play an important role in DA-specific functional and morphologic characteristics.

## Supporting Information

**Figure S1 The representative figures of FACS gating strategy.** Cell debris and doublets were removed by light scattering; forward-scattered light (FSC) and side-scattered light (SSC). FSC and SSC are the parameter of cell-surface area/size and cell-internal complexity, respectively. A. The primary gating was done by removing the factors that affected FSC- and SSC-area. B. The secondary gating with FSC-height and width. C. The third gating with SSC-height and width. D. After those three gating steps by light scattering, dead cells were detected and removed by propidium iodide (PI) staining. E. Population of cells reacted with FITC-conjugated anti-CD31 antibody and APC-Cy7-conjugated anti-CD45 antibody. F. Population of cells reacted with fluorescence conjugated anti-control IgG antibodies to confirm nonspecific binding of antibodies. (TIFF)

**Figure S2 Validation using quantitative RT-PCR.** (TIFF)

**Table S1 The genes that have  $p < 0.001$  but range between  $0.5 < \text{Fold change} < 2.0$  in F.** (DOCX)

**Table S2 The genes that have  $p < 0.001$  but range between  $0.5 < \text{Fold change} < 2.0$  in N.** (DOCX)

## Author Contributions

Conceived and designed the experiments: NML TK S. Minamisawa. Performed the experiments: NML TY PL S. Maekawa IT. Analyzed the data: NML TY S. Maekawa IT TK. Contributed reagents/materials/analysis tools: S. Maekawa IT TK HT UY. Wrote the paper: NML PL S. Minamisawa.

## References

- Aird WC (2007) Phenotypic heterogeneity of the endothelium: I. Structure, function, and mechanisms. *Circ Res* 100:158–173.
- Dejana E (2010) The role of wnt signaling in physiological and pathological angiogenesis. *Circ Res* 107:943–952.
- Cleaver O, Melton DA (2003) Endothelial signaling during development. *Nature medicine* 9:661–668.
- Lacorre DA, Baekkevold ES, Garrido I, Brandtzaeg P, Haraldsen G, et al. (2004) Plasticity of endothelial cells: Rapid dedifferentiation of freshly isolated high endothelial venule endothelial cells outside the lymphoid tissue microenvironment. *Blood* 103:4164–4172.
- Smith GC (1998) The pharmacology of the ductus arteriosus. *Pharmacol Rev* 50:35–58.
- Weir EK, Lopez-Barneo J, Buckler KJ, Archer SL (2005) Acute oxygen-sensing mechanisms. *N Engl J Med* 353:2042–2055.
- Yokoyama U, Minamisawa S, Ishikawa Y (2010) Regulation of vascular tone and remodeling of the ductus arteriosus. *J Smooth Muscle Res* 46:77–87.
- Agren P, van der Sterren S, Cogolludo AL, Frazziano G, de Mey JG, et al. (2008) Developmental changes in endothelium-dependent relaxation of the chicken ductus arteriosus. *J Physiol Pharmacol* 59:55–76.
- Baragatti B, Brizzi F, Barogi S, Laubach VE, Sodini D, et al. (2007) Interactions between no, co and an endothelium-derived hyperpolarizing factor (edhf) in maintaining patency of the ductus arteriosus in the mouse. *Br J Pharmacol* 151:54–62.
- Coburn RF, Eppinger R, Scott DP (1986) Oxygen-dependent tension in vascular smooth muscle. Does the endothelium play a role? *Circ Res* 58:341–347.
- Fox JJ, Ziegler JW, Ivy DD, Halbower AC, Kinsella JP, et al. (1996) Role of nitric oxide and cgmp system in regulation of ductus arteriosus tone in ovine fetus. *The American journal of physiology* 271:H2638–2645.
- Weber SC, Gratopp A, Akanbi S, Rheinlaender C, Sallmon H, et al. (2011) Isolation and culture of fibroblasts, vascular smooth muscle, and endothelial cells from the fetal rat ductus arteriosus. *Pediatr Res* 70:236–241.

13. Yokoyama U, Minamisawa S, Adachi-Akahane S, Akaike T, Naguro I, et al. (2006) Multiple transcripts of ca2+ channel alpha1-subunits and a novel spliced variant of the alpha1c-subunit in rat ductus arteriosus. *Am J Physiol Heart Circ Physiol* 290:H1660–1670.
14. Bessarabova M, Ishkin A, JeBailey L, Nikolskaya T, Nikolsky Y (2012) Knowledge-based analysis of proteomics data. *BMC bioinformatics* 13 Suppl 16:S13.
15. Boudreau N, Clausell N, Boyle J, Rabinovitch M (1992) Transforming growth factor-beta regulates increased ductus arteriosus endothelial glycosaminoglycan synthesis and a post-transcriptional mechanism controls increased smooth muscle fibronectin, features associated with intimal proliferation. *Lab Invest* 67:350–359.
16. Zhou B, Coulber C, Rabinovitch M (1998) Tissue-specific and developmental regulation of transforming growth factor-beta1 expression in fetal lamb ductus arteriosus endothelial cells. *Pediatr Res* 44:865–872.
17. Jin MH, Yokoyama U, Sato Y, Shioda A, Jiao Q, et al. (2011) DNA microarray profiling identified a new role of growth hormone in vascular remodeling of rat ductus arteriosus. *The journal of physiological sciences: JPS* 61:167–179.
18. Costa M, Barogi S, Socci ND, Angeloni D, Maffei M, et al. (2006) Gene expression in ductus arteriosus and aorta: Comparison of birth and oxygen effects. *Physiol Genomics* 25:250–262.
19. Akaike T, Jin MH, Yokoyama U, Izumi-Nakaseko H, Jiao Q, et al. (2009) T-type ca2+ channels promote oxygenation-induced closure of the rat ductus arteriosus not only by vasoconstriction but also by neointima formation. *The Journal of biological chemistry* 284:24025–24034.
20. Yokoyama U, Minamisawa S, Quan H, Ghatak S, Akaike T, et al. (2006) Chronic activation of the prostaglandin receptor ep4 promotes hyaluronan-mediated neointimal formation in the ductus arteriosus. *The Journal of clinical investigation* 116:3026–3034.
21. Subramanian A, Tamayo P, Mootha VK, Mukherjee S, Ebert BL, et al. (2005) Gene set enrichment analysis: A knowledge-based approach for interpreting genome-wide expression profiles. *Proceedings of the National Academy of Sciences of the United States of America* 102:15545–15550.
22. Ivey KN, Sutcliffe D, Richardson J, Clyman RI, Garcia JA, et al. (2008) Transcriptional regulation during development of the ductus arteriosus. *Circ Res* 103:388–395.
23. Huang J, Cheng L, Li J, Chen M, Zhou D, et al. (2008) Myocardin regulates expression of contractile genes in smooth muscle cells and is required for closure of the ductus arteriosus in mice. *The Journal of clinical investigation* 118:515–525.
24. Hiruma T, Nakajima Y, Nakamura H (2002) Development of pharyngeal arch arteries in early mouse embryo. *Journal of anatomy* 201:15–29.
25. Watanabe Y, Buckingham M (2010) The formation of the embryonic mouse heart: Heart fields and myocardial cell lineages. *Annals of the New York Academy of Sciences* 1188:15–24.
26. Waldo KL, Kirby ML (1993) Cardiac neural crest contribution to the pulmonary artery and sixth aortic arch artery complex in chick embryos aged 6 to 18 days. *The Anatomical record* 237:385–399.
27. Bergwerff M, Verberne ME, DeRuiter MC, Poelmann RE, Gittenberger-de Groot AC (1998) Neural crest cell contribution to the developing circulatory system: Implications for vascular morphology? *Circ Res* 82:221–231.
28. Makki N, Capecchi MR (2012) Cardiovascular defects in a mouse model of ho1 syndrome. *Human molecular genetics* 21:26–31.
29. Favier B, Dolle P (1997) Developmental functions of mammalian hox genes. *Molecular human reproduction* 3:115–131.
30. Srivastava D, Thomas T, Lin Q, Kirby ML, Brown D, et al. (1997) Regulation of cardiac mesodermal and neural crest development by the bhlh transcription factor, dhand. *Nature genetics* 16:154–160.
31. Bergwerff M, DeRuiter MC, Gittenberger-de Groot AC (1999) Comparative anatomy and ontogeny of the ductus arteriosus, a vascular outsider. *Anat Embryol (Berl)* 200:559–571.
32. Bosley TM, Alorainy IA, Salih MA, Aldhalaan HM, Abu-Amero KK, et al. (2008) The clinical spectrum of homozygous hox1 mutations. *American journal of medical genetics. Part A* 146A:1235–1240.
33. Rana MS, Sizarov A, Christoffels VM, Moorman AF (2013) Development of the human aortic arch system captured in an interactive three-dimensional reference model. *American journal of medical genetics Part A*.
34. Golzio C, Havis E, Daubas P, Nucl G, Babarit C, et al. (2012) Isl1 directly regulates fgf10 transcription during human cardiac outflow formation. *PLoS One* 7:e30677.
35. Watanabe Y, Zaffran S, Kuroiwa A, Higuchi H, Ogura T, et al. (2012) Fibroblast growth factor 10 gene regulation in the second heart field by tbx1, nkx2-5, and islet1 reveals a genetic switch for down-regulation in the myocardium. *Proceedings of the National Academy of Sciences of the United States of America* 109:18273–18280.
36. Diez M, Musri MM, Ferrer E, Barbera JA, Peinado VI (2010) Endothelial progenitor cells undergo an endothelial-to-mesenchymal transition-like process regulated by tgfbeta1. *Cardiovascular research* 88:502–511.
37. Arciniegas E, Neves CY, Carrillo LM, Zambrano EA, Ramirez R (2005) Endothelial-mesenchymal transition occurs during embryonic pulmonary artery development. *Endothelium: journal of endothelial cell research* 12:193–200.
38. Moonen JR, Krenning G, Brinker MG, Koerts JA, van Luyn MJ, et al. (2010) Endothelial progenitor cells give rise to pro-angiogenic smooth muscle-like progeny. *Cardiovascular research* 86:506–515.
39. van Meeteren LA, ten Dijke P (2012) Regulation of endothelial cell plasticity by tgfbeta. *Cell and tissue research* 347:177–186.
40. De Reeder EG, Girard N, Poelmann RE, Van Munsteren JC, Patterson DF, et al. (1988) Hyaluronic acid accumulation and endothelial cell detachment in intimal thickening of the vessel wall. The normal and genetically defective ductus arteriosus. *The American journal of pathology* 132:574–585.
41. Bokenkamp R, Gittenberger-De Groot AC, Van Munsteren CJ, Grauss RW, Ottenkamp J, et al. (2006) Persistent ductus arteriosus in the brown-norway inbred rat strain. *Pediatr Res* 60:407–412.
42. Bokenkamp R, DeRuiter MC, van Munsteren C, Gittenberger-de Groot AC (2010) Insights into the pathogenesis and genetic background of patency of the ductus arteriosus. *Neonatology* 98:6–17.
43. Colbert MC, Kirby ML, Robbins J (1996) Endogenous retinoic acid signaling colocalizes with advanced expression of the adult smooth muscle myosin heavy chain isoform during development of the ductus arteriosus. *Circ Res* 78:790–798.
44. Momma K, Toyono M, Miyagawa-Tomita S (1998) Accelerated maturation of fetal ductus arteriosus by maternally administered vitamin a in rats. *Pediatr Res* 43:629–632.
45. Wu GR, Jing S, Momma K, Nakanishi T (2001) The effect of vitamin a on contraction of the ductus arteriosus in fetal rat. *Pediatr Res* 49:747–754.
46. Yokoyama U, Sato Y, Akaike T, Ishida S, Sawada J, et al. (2007) Maternal vitamin a alters gene profiles and structural maturation of the rat ductus arteriosus. *Physiol Genomics* 31:139–157.
47. Ravishanker C, Nafday S, Green RS, Kamenir S, Lorber R, et al. (2003) A trial of vitamin a therapy to facilitate ductal closure in premature infants. *J Pediatr* 143:644–648.
48. Zile MH (2010) Vitamin a-not for your eyes only: Requirement for heart formation begins early in embryogenesis. *Nutrients* 2:532–550.
49. Amengual J, Golczak M, Palczewski K, von Lintig J (2012) Lecithin:Retinol acyltransferase is critical for cellular uptake of vitamin a from serum retinol-binding protein. *The Journal of biological chemistry* 287:24216–24227.
